# Supplementary material for: Reflected ray retrieval from radio occultation data using radioholographic filtering of wave fields in ray space
Source: Copernicus journal article supplement (doi:10.5194/amt-2017-189), 2017-08-23
Supplement: Supplementary file [file amt-2017-189-AC1-supplement.pdf]

## Anonymous Referee #1

*The authors present an advanced method to detect reflection signals in GPS occultation data. The method is clearly described with nice viewgraphs, detailed formulas and examples. I do not notice any error. Generally, the article is well suited for a publication in the AMT journal.*

We are grateful to the reviewer for the positive estimate of our paper.
